# Supplementary material for: Synthesis and biological evaluation of 1-(2-(adamantane-1-yl)-1H-indol-5-yl)-3-substituted urea/thiourea derivatives as anticancer agents
Source: Royal Society of Chemistry journal article supplement (doi:10.1039/c7ra08149a), 2017-01-01
Supplement: c7ra08149a1.pdf [file c7ra08149a1.pdf]

Title: Synthesis and biological evaluation of 1-(2-(adamantan-1-yl)-1H-indol-5-yl)-3-substituted urea/thiourea derivatives as potential anticancer agents

Authors: H. Y. Hu,<sup>a#</sup> C. R. Lin,<sup>a#</sup> M. T. Ao,<sup>a#</sup> Y. F. Ji,<sup>a</sup> B. W. Tang,<sup>a</sup> X. X. Zhou,<sup>a</sup> M. J. Fang,<sup>a\*</sup> J. Z. Zeng<sup>a\*</sup> and Z. Wu<sup>a\*</sup>

## Supporting Information

Figure S1. The <sup>1</sup>H-NMR Spectra of compound **7s** and its identification

Figure S2. The <sup>13</sup>C-NMR Spectra of compound **7s** and its identification

Spectra data of compounds **7a~7m**, **7o~7r**, **7t~7v**, **7x~7y** and **9b~9o**

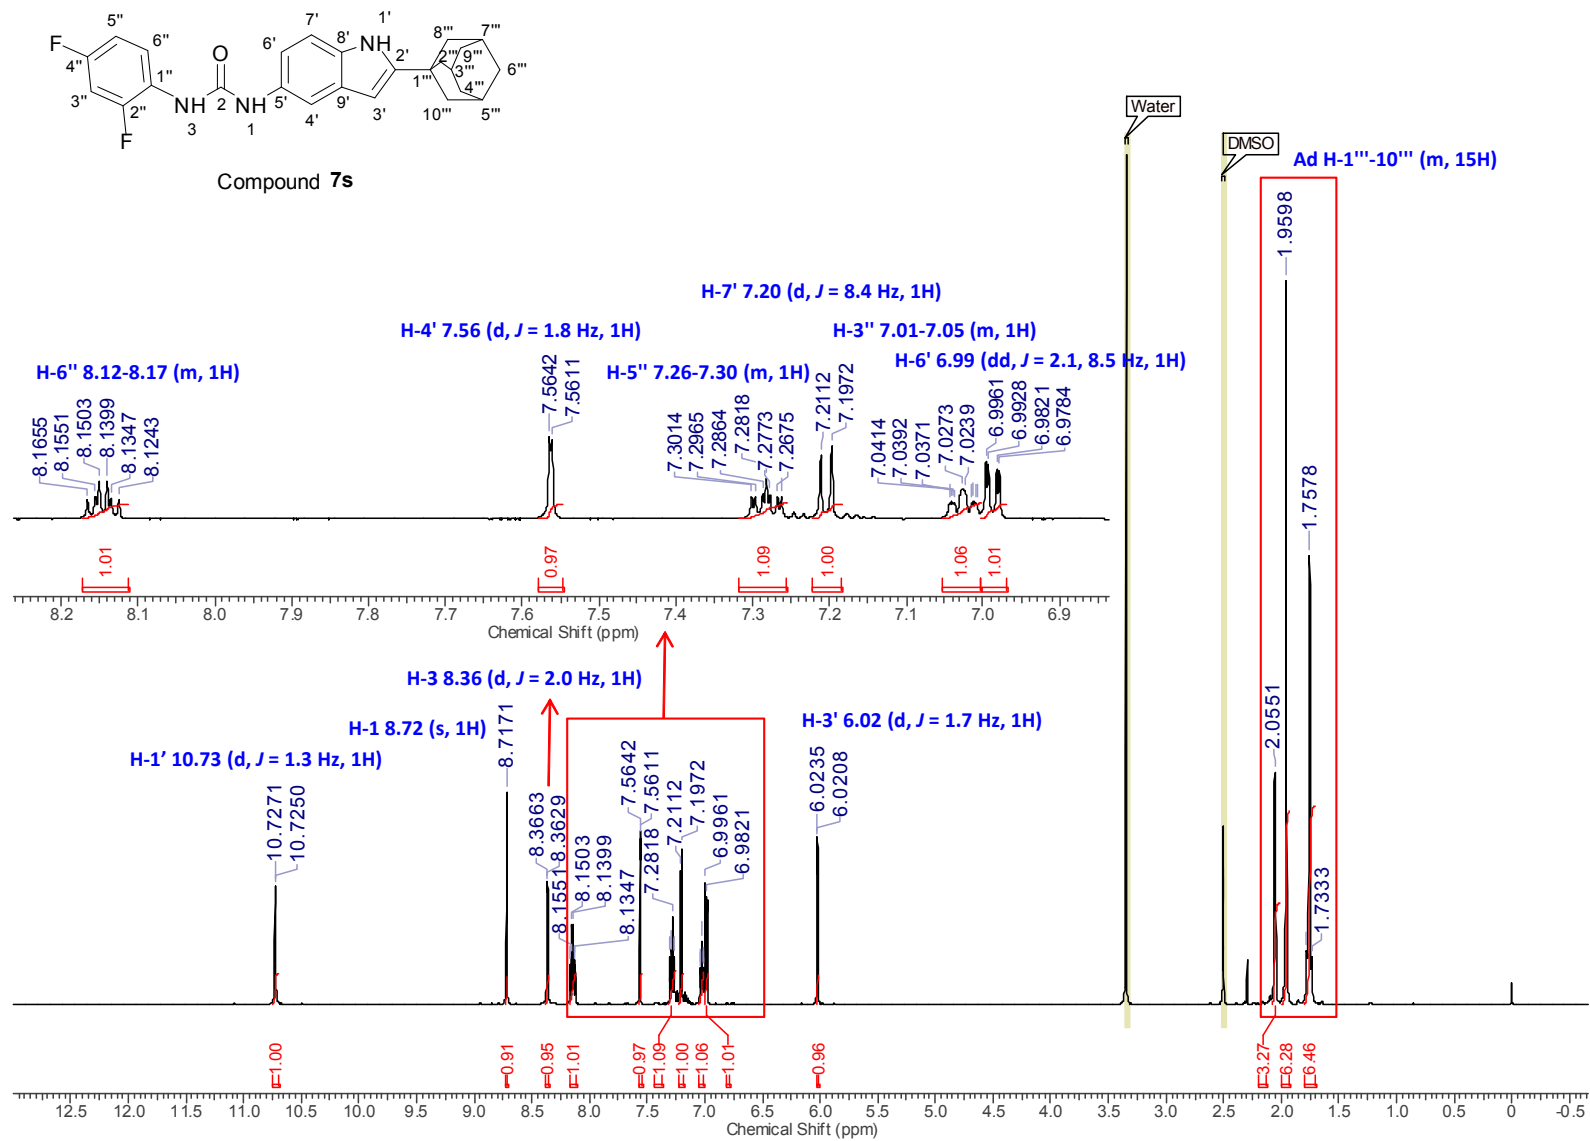

Figure S1. The  $^1\text{H-NMR}$  Spectra of compound **7s** and its identification

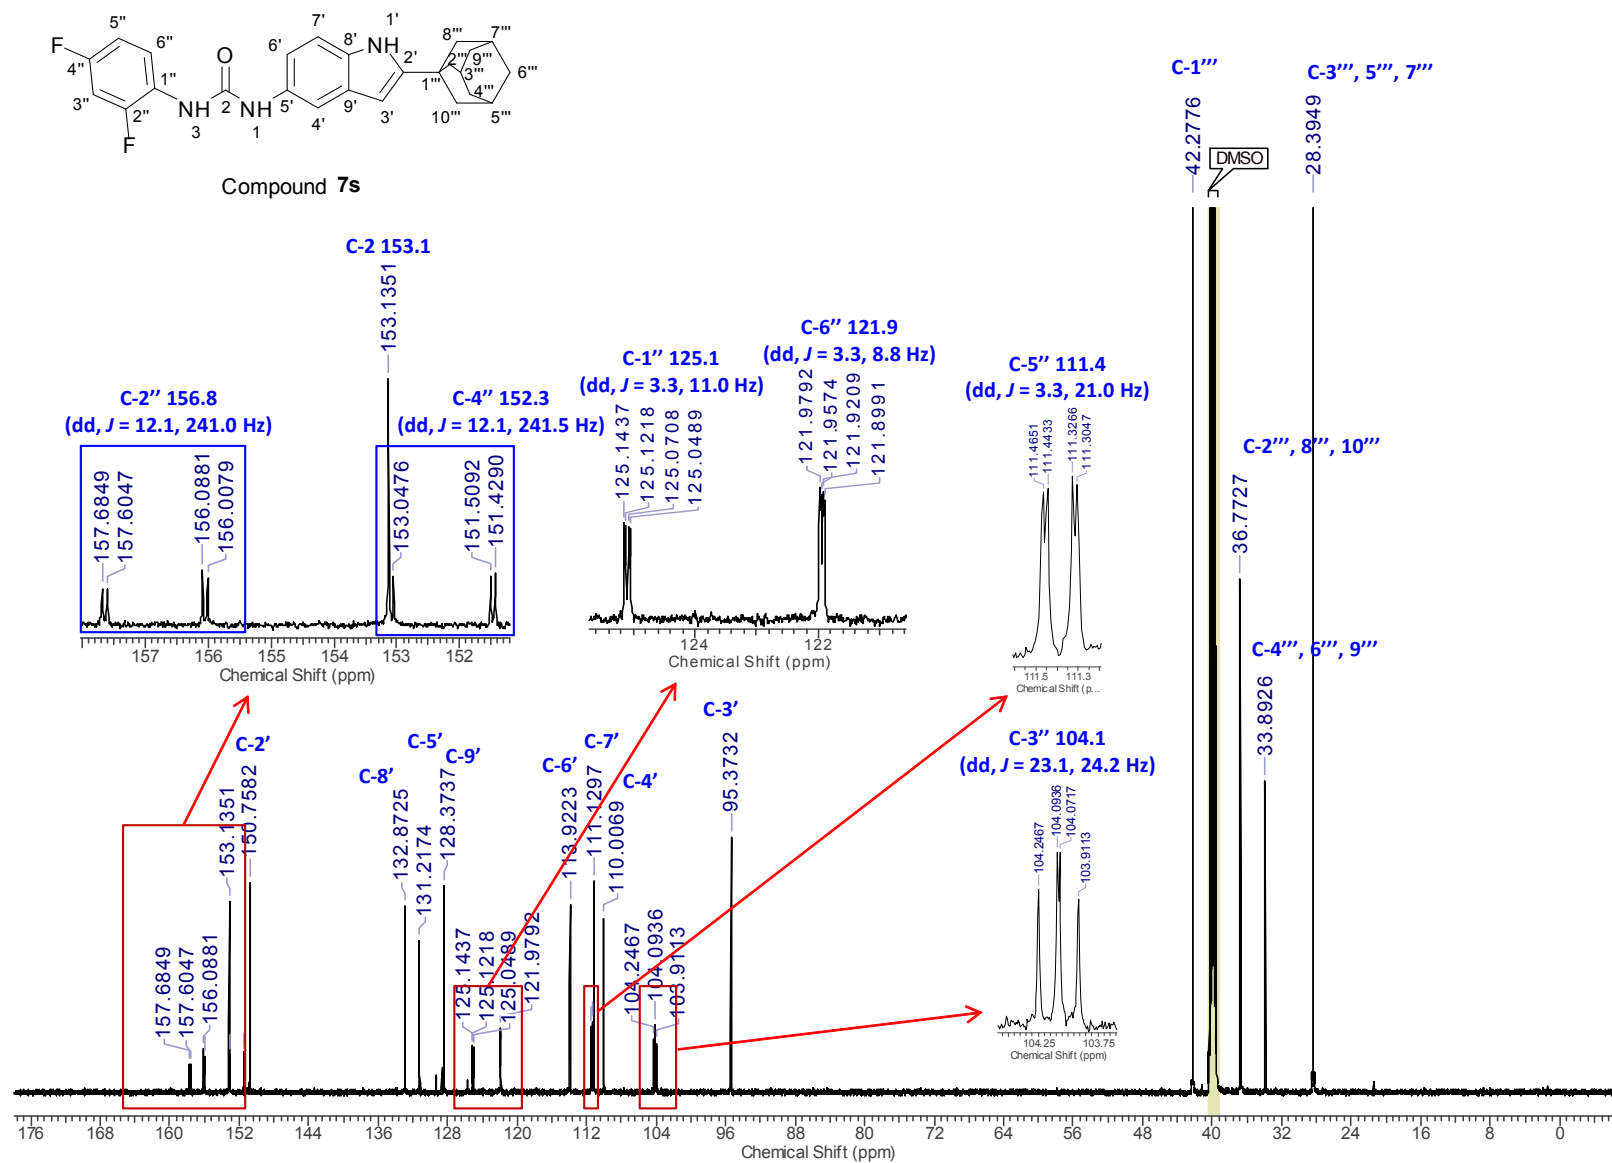

Figure S2. The  $^{13}\text{C}$ -NMR Spectra of compound 7s and its identification

**1-tert-butyl-3-(2-adamantine-1H-indol-5-yl)urea (7a):** White solid; yield: 88.6%; mp: 247-248 °C; HPLC purity: 98.54% ( $t_R = 18.25$  min);  $^1\text{H}$  NMR (600 MHz, DMSO- $d_6$ ):  $\delta$  10.60 (s, 1H, NH-1'), 7.87 (s, 1H, C=ONH-1), 7.45 (d,  $J = 1.3$  Hz, 1H, Ar-H), 7.11 (d,  $J = 8.4$  Hz, 1H, Ar-H), 6.88 (dd,  $J = 1.8, 8.4$  Hz, 1H, Ar-H), 5.96 (d,  $J = 1.6$  Hz, 1H, H-3'), 5.79 (s, 1H, C=ONH-3), 2.03-2.08 (m, 3H, Ad-H), 1.93-1.97 (m, 6H, Ad-H), 1.72-1.79 (m, 6H, Ad-H), 1.30 (s, 9H,  $(\text{CH}_3)_3\text{C}$ );  $^{13}\text{C}$  NMR (150 MHz, DMSO- $d_6$ ):  $\delta$  155.5 (C=O), 150.4 (C-2'), 132.6 (Ar-C), 132.2 (Ar-C), 129.4 (Ar-C), 113.5 (Ar-CH), 110.9 (Ar-CH), 109.0 (Ar-CH), 95.2 (C-3'), 49.7 ( $(\text{CH}_3)_3\text{C}$ ), 42.3 (Ad-C), 36.8 (s, 3C, Ad-C), 33.9 (s, 3C, Ad-C), 29.7 (s, 3C,  $(\text{CH}_3)_3\text{C}$ ), 28.4 (s, 3C, Ad-C); ESI-HRMS (+):  $m/z$   $[\text{M}+\text{H}]^+$  calculated for  $\text{C}_{23}\text{H}_{32}\text{N}_3\text{O}^+$ , 366.2540, found 366.2534;  $[\text{M}+\text{Na}]^+$  calculated for  $\text{C}_{23}\text{H}_{31}\text{N}_3\text{ONa}^+$ , 388.2359, found 388.2351.

**1-cyclobutyl-3-(2-adamantine-1H-indol-5-yl)urea (7b):** White solid; yield: 86.6%; mp: 234-235 °C; HPLC purity: 92.8% ( $t_R = 16.80$  min);  $^1\text{H}$  NMR (600 MHz, DMSO- $d_6$ ):  $\delta$  10.63 (d,  $J = 1.1$  Hz, 1H, NH-1'), 7.95 (s, 1H, C=ONH-1), 7.45 (d,  $J = 1.8$  Hz, 1H, Ar-H), 7.13 (d,  $J = 8.4$  Hz, 1H, Ar-H), 6.92 (dd,  $J = 1.9, 8.5$  Hz, 1H, Ar-H), 6.20 (d,  $J = 8.3$  Hz, 1H, H-3'), 5.97 (d,  $J = 1.5$  Hz, 1H, C=ONH-3), 4.10-4.19 (m, 1H, cyclobutyl-H), 2.16-2.23 (m, 2H, cyclobutyl-H), 2.03-2.08 (m, 3H, Ad-H), 1.92-1.98 (m, 6H, Ad-H), 1.79-1.87 (m, 2H, cyclobutyl-H), 1.72-1.79 (m, 6H, Ad-H), 1.54-1.65 (m, 2H, cyclobutyl-H);  $^{13}\text{C}$  NMR (150 MHz, DMSO- $d_6$ ):  $\delta$  155.3 (C=O), 150.3 (C-2'), 132.5 (Ar-C), 132.2 (Ar-C), 128.3 (Ar-C), 114.0 (Ar-CH), 110.9 (Ar-CH), 109.7 (Ar-CH), 95.2 (C-3'), 44.7 (cyclobutyl-C), 42.1 (Ad-C), 36.8 (s, 3C, Ad-C), 33.9 (s, 3C, Ad-C), 31.8 (s, 2C, cyclobutyl-C), 28.4 (s, 3C, Ad-C), 14.8 (cyclobutyl-C); ESI-HRMS (+):  $m/z$   $[\text{M}+\text{H}]^+$  calculated for  $\text{C}_{23}\text{H}_{30}\text{N}_3\text{O}^+$ , 364.2383, found 364.2377;  $[\text{M}+\text{Na}]^+$  calculated for  $\text{C}_{23}\text{H}_{29}\text{N}_3\text{ONa}^+$ , 386.2203, found 386.2196.

**1-butyl-3-(2-adamantine-1H-indol-5-yl)urea (7c):** White solid; yield: 94.2%; mp: 237-239 °C; HPLC purity: 96.3% ( $t_R = 24.80$  min);  $^1\text{H}$  NMR (600 MHz, DMSO- $d_6$ ):  $\delta$  10.62 (d,  $J = 1.1$  Hz, 1H, NH-1'), 7.99 (s, 1H, C=ONH-1), 7.45 (d,  $J = 1.8$  Hz, 1H, Ar-H), 7.12 (d,  $J = 8.6$  Hz, 1H, Ar-H), 6.91 (dd,  $J = 2.0, 8.6$  Hz, 1H, Ar-H), 5.96 (d,  $J = 1.5$  Hz, 1H, H-3'), 5.90 (t,  $J = 5.7$  Hz, 1H, C=ONH-3), 3.04-3.09 (m, 2H, butyl-H), 2.02-2.07 (m, 3H, Ad-H), 1.92-1.97 (m, 6H, Ad-H), 1.72-1.79 (m, 6H, Ad-H), 1.37-1.43 (m, 2H, butyl-H), 1.27-1.35 (m, 2H, butyl-H), 0.89 (t,  $J = 7.3$  Hz, 3H, butyl-H);  $^{13}\text{C}$  NMR (150 MHz, DMSO- $d_6$ ):  $\delta$  156.3 (C=O), 150.4 (C-2'), 132.5 (Ar-C), 132.4 (Ar-C), 128.4 (Ar-C), 113.9 (Ar-CH), 110.9 (Ar-CH), 109.5 (Ar-CH), 95.2 (C-3'), 42.3 (Ad-C), 39.2 (butyl-C), 36.8 (s, 3C, Ad-C), 33.9 (s, 3C, Ad-C), 32.5 (butyl-C), 28.4 (s, 3C, Ad-C), 20.0 (butyl-C), 14.2 (butyl-C); ESI-HRMS (+):  $m/z$   $[\text{M}+\text{H}]^+$  calculated for  $\text{C}_{23}\text{H}_{32}\text{N}_3\text{O}^+$ , 366.2541, found 366.2537;  $[\text{M}+\text{Na}]^+$  calculated for  $\text{C}_{23}\text{H}_{31}\text{N}_3\text{ONa}^+$ , 388.2359, found 388.2354.

**1-octyl-3-(2-adamantine-1H-indol-5-yl)urea (7d):** White solid; yield: 95.6%; mp: 232-234 °C; HPLC purity: 96.9% ( $t_R = 25.00$  min);  $^1\text{H}$  NMR (600 MHz, DMSO- $d_6$ ):  $\delta$  10.63 (d,  $J = 1.1$  Hz, 1H, NH-1'), 8.01 (s, 1H, C=ONH-1), 7.46 (d,  $J = 1.8$  Hz, 1H, Ar-H), 7.13 (d,  $J = 8.6$  Hz, 1H, Ar-H), 6.92 (dd,  $J = 2.0, 8.6$  Hz, 1H, Ar-H), 5.97 (d,  $J = 1.5$  Hz, 1H, H-3'), 5.92 (t,  $J = 5.6$  Hz, 1H, C=ONH-3), 3.06 (q,  $J = 6.8$  Hz, 2H, octyl-H), 2.02-2.07 (m, 3H, Ad-H), 1.92-1.97 (m, 6H, Ad-H), 1.72-1.79 (m, 6H, Ad-H), 1.38-1.45 (m, 2H, octyl-H), 1.20-1.32 (m, 10H, octyl-H), 0.84-0.89 (m, 3H, octyl-H);  $^{13}\text{C}$  NMR (150

MHz, DMSO- $d_6$ ):  $\delta$  156.3 (C=O), 150.4 (C-2'), 132.5 (Ar-C), 132.4 (Ar-C), 128.4 (Ar-C), 113.9 (Ar-CH), 110.9 (Ar-CH), 109.6 (Ar-CH), 95.2 (C-3'), 42.3 (Ad-C), 39.6 (octyl-C), 36.8 (s, 3C, Ad-C), 33.9 (s, 3C, Ad-C), 31.7 (octyl-C), 30.4 (octyl-C), 29.3 (octyl-C), 29.2 (octyl-C), 28.4 (s, 3C, Ad-C), 26.9 (octyl-H), 22.6 (octyl-H), 14.4 (octyl-H); ESI-HRMS (+):  $m/z$  [M+H]<sup>+</sup> calculated for C<sub>27</sub>H<sub>40</sub>N<sub>3</sub>O<sup>+</sup>, 422.3166, found 422.3163; [M+Na]<sup>+</sup> calculated for C<sub>27</sub>H<sub>39</sub>N<sub>3</sub>ONa<sup>+</sup>, 444.2985, found 444.2982.

**1-cyclooctyl-3-(2-adamantine-1H-indol-5-yl)urea (7e):** White solid; yield: 85.8%; mp: 214-215 °C; HPLC purity: 98.85% ( $t_R$  = 17.65 min); <sup>1</sup>H NMR (600 MHz, DMSO- $d_6$ ):  $\delta$  10.60 (d,  $J$  = 1.1 Hz, 1H, NH-1'), 7.91 (s, 1H, C=ONH-1), 7.45 (d,  $J$  = 1.7 Hz, 1H, Ar-H), 7.12 (d,  $J$  = 8.4 Hz, 1H, Ar-H), 6.90 (dd,  $J$  = 2.0, 8.6 Hz, 1H, Ar-H), 5.95 (d,  $J$  = 1.7 Hz, 1H, H-3'), 5.89 (d,  $J$  = 7.8 Hz, 1H, C=ONH-3), 3.67-3.73 (m, 1H, cyclooctyl-H), 2.02-2.07 (m, 3H, Ad-H), 1.92-1.97 (m, 6H, Ad-H), 1.72-1.79 (m, 8H, Ad-6H and cyclooctyl-2H), 1.43-1.67 (m, 12H, cyclooctyl-H); <sup>13</sup>C NMR (150 MHz, DMSO- $d_6$ ):  $\delta$  155.4 (C=O), 150.4 (C-2'), 132.6 (Ar-C), 132.3 (Ar-C), 128.4 (Ar-C), 113.6 (Ar-CH), 110.9 (Ar-CH), 109.2 (Ar-CH), 95.2 (C-3'), 49.1 (cyclooctyl-C), 42.3 (Ad-C), 36.8 (s, 3C, Ad-C), 33.9 (s, 3C, Ad-C), 32.4 (s, 2C, cyclooctyl-C), 28.4 (s, 3C, Ad-C), 27.5 (s, 2C, cyclooctyl-C), 25.4 (cyclooctyl-C), 23.6 (s, 2C, cyclooctyl-C); ESI-HRMS (+):  $m/z$  [M+H]<sup>+</sup> calculated for C<sub>27</sub>H<sub>38</sub>N<sub>3</sub>O<sup>+</sup> 420.3009, found 420.3004; [M+Na]<sup>+</sup> calculated for C<sub>27</sub>H<sub>37</sub>N<sub>3</sub>ONa<sup>+</sup> 442.2829, found 442.2823.

**1-(2-adamantine-1H-indol-5-yl)-3-phenethylurea (7f):** White solid; yield: 90.3%; mp: 256-257 °C; HPLC purity: 97.6% ( $t_R$  = 18.74 min); <sup>1</sup>H NMR (600 MHz, DMSO- $d_6$ ):  $\delta$  10.63 (d,  $J$  = 1.3 Hz, 1H, NH-1'), 8.09 (s, 1H, C=ONH-1), 7.46 (d,  $J$  = 1.8 Hz, 1H, Ar-H), 7.29-7.33 (m, 2H, Ar-H), 7.24 (d,  $J$  = 7.0 Hz, 2H, Ar-H), 7.19-7.22 (m, 1H, Ar-H), 7.13 (d,  $J$  = 8.4 Hz, 1H, Ar-H), 6.91 (dd,  $J$  = 2.0, 8.6 Hz, 1H, Ar-H), 5.97 (d,  $J$  = 1.7 Hz, 1H, H-3'), 5.91 (t,  $J$  = 5.7 Hz, 1H, C=ONH-3), 3.30-3.34 (m, 2H, C=ONH-CH<sub>2</sub>), 2.74 (t,  $J$  = 7.2 Hz, 2H, Ph-CH<sub>2</sub>), 2.02-2.07 (m, 3H, Ad-H), 1.92-1.97 (m, 6H, Ad-H), 1.71-1.79 (m, 6H, Ad-H); <sup>13</sup>C NMR (150 MHz, DMSO- $d_6$ ):  $\delta$  156.2 (C=O), 150.4 (C-2'), 140.2 (Ar-C), 132.45 (Ar-C), 132.37 (Ar-C), 129.2 (s, 2C, C-3'',5''), 128.8 (s, 2C, C-2'',6''), 128.4 (Ar-C), 126.5 (Ar-CH), 114.0 (Ar-CH), 110.9 (Ar-CH), 109.6 (Ar-CH), 95.2 (C-3'), 42.3 (Ad-C), 41.2 (C=ONH-CH<sub>2</sub>), 36.8 (s, 3C, Ad-C), 36.5 (Ph-CH<sub>2</sub>), 33.9 (s, 3C, Ad-C), 28.4 (s, 3C, Ad-C); ESI-HRMS (+):  $m/z$  [M+H]<sup>+</sup> calculated for C<sub>27</sub>H<sub>32</sub>N<sub>3</sub>O<sup>+</sup>, 414.2540, found 414.2693; [M+Na]<sup>+</sup> calculated for C<sub>27</sub>H<sub>31</sub>N<sub>3</sub>ONa<sup>+</sup>, 436.2359, found 436.2355.

**1-(2-adamantine-1H-indol-5-yl)-3-(3-phenylpropyl)urea (7g):** White solid; yield: 90.4%; mp: 266-267 °C; HPLC purity: 97.6% ( $t_R$  = 18.13 min); <sup>1</sup>H NMR (600 MHz, DMSO- $d_6$ ):  $\delta$  10.64 (br s, 1H, NH-1), 8.06 (br s, 1H, C=ONH-1), 7.48 (s, 1H, Ar-H), 7.26-7.31 (m, 2H, Ar-H), 7.22 (d,  $J$  = 7.0 Hz, 2H, Ar-H), 7.13-7.20 (m, 2H, Ar-H), 6.95 (d,  $J$  = 8.1 Hz, 1H, Ar-H), 6.00-6.04 (m, 1H, H-3'), 5.98 (br s, 1H, C=ONH-3), 3.07-3.13 (m, 2H, C=ONH-CH<sub>2</sub>), 2.57-2.65 (m, 2H, Ph-CH<sub>2</sub>), 2.02-2.07 (m, 3H, Ad-H), 1.92-1.97 (m, 6H, Ad-H), 1.71-1.79 (m, 8H, Ad-6H and Ph-CH<sub>2</sub>CH<sub>2</sub>); <sup>13</sup>C NMR (150 MHz, DMSO- $d_6$ ):  $\delta$  156.4 (C=O), 150.4 (C-2'), 142.2 (Ar-C), 132.5 (Ar-C), 132.4 (Ar-C), 128.7 (s, 4C, C-2'',3'',5'',6''), 128.4 (Ar-C), 126.2 (Ar-CH), 114.0 (Ar-CH), 110.9 (Ar-CH), 109.7 (Ar-CH), 95.2 (C-3'), 42.3 (Ad-C), 39.2 (C=ONH-CH<sub>2</sub>), 36.8 (s, 3C, Ad-C), 33.9 (s, 3C, Ad-C), 33.0 (Ph-CH<sub>2</sub>), 32.2 (Ph-CH<sub>2</sub>CH<sub>2</sub>), 28.4 (s,

3C, Ad-C); ESI-HRMS (+):  $m/z$   $[M+H]^+$  calculated for  $C_{28}H_{34}N_3O^+$ , 428.2696, found 428.2692;  $[M+Na]^+$  calculated for  $C_{28}H_{33}N_3ONa^+$ , 450.2516, found 450.2511.

**1-(2-adamantine-1H-indol-5-yl)-3-(4-phenylbutyl)urea (7h):** White solid; yield: 87.9%; mp: 239-240 °C; HPLC purity: 95.5% ( $t_R$  = 21.24 min);  $^1H$  NMR (600 MHz, DMSO- $d_6$ ):  $\delta$  10.62(s, 1H, NH-1), 7.99 (s, 1H, C=ONH-1), 7.45 (s, 1H, Ar-H), 7.24-7.29 (m, 2H, Ar-H), 7.20 (d,  $J$  = 7.5 Hz, 2H, Ar-H), 7.11-7.18 (m, 2H, Ar-H), 6.92 (d,  $J$  = 8.6 Hz, 1H, Ar-H), 5.96 (s, 1H, H-3'), 5.92 (t,  $J$  = 5.6 Hz, 1H, C=ONH-3), 3.10 (q,  $J$  = 6.4 Hz, 2H, C=ONH- $CH_2$ ), 2.56-2.62 (t,  $J$  = 7.6 Hz, 2H, Ph- $CH_2$ ), 2.02-2.07 (m, 3H, Ad-H), 1.92-1.97 (m, 6H, Ad-H), 1.71-1.79 (m, 6H, Ad-H), 1.55-1.62 (m, 2H, Ph- $CH_2CH_2$ ), 1.40-1.47 (m, 2H, Ph- $CH_2CH_2CH_2$ );  $^{13}C$  NMR (150 MHz, DMSO- $d_6$ ):  $\delta$  156.3 (C=O), 150.4 (C-2'), 142.7 (Ar-C), 132.45 (Ar-C), 132.43 (Ar-C), 128.8 (s, 2C, C-3'',5''), 128.7 (s, 2C, C-2'',6''), 128.4 (Ar-C), 126.1 (Ar-CH), 114.0 (Ar-CH), 110.9 (Ar-CH), 109.6 (Ar-CH), 95.2 (C-3'), 42.3 (Ad-C), 39.4 (C=ONH- $CH_2$ ), 36.8 (s, 3C, Ad-C), 35.4 (Ph- $CH_2$ ), 33.9 (s, 3C, Ad-C), 30.1 (Ph- $CH_2CH_2CH_2$ ), 28.9 (Ph- $CH_2CH_2$ ), 28.4 (s, 3C, Ad-C); ESI-HRMS (+):  $m/z$   $[M+H]^+$  calculated for  $C_{29}H_{36}N_3O^+$ , 442.2853, found 442.2847;  $[M+Na]^+$  calculated for  $C_{29}H_{35}N_3ONa^+$ , 464.2672, found 464.2668.

**1-(2-adamantine-1H-indol-5-yl)-3-(naphthalen-2-ylmethyl) urea (7i):** White solid; yield: 87.6%; mp: 234-235 °C; HPLC purity: 94.6% ( $t_R$  = 18.90 min);  $^1H$  NMR (600 MHz, DMSO- $d_6$ ):  $\delta$  10.67 (d,  $J$  = 1.3 Hz, 1H, NH-1), 8.13-8.19 (m, 2H), 7.96 (d,  $J$  = 7.7 Hz, 1H, Ar-H), 7.86 (d,  $J$  = 7.9 Hz, 1H, Ar-H), 7.47-7.61 (m, 5H, Ar-H), 7.17 (d,  $J$  = 8.4 Hz, 1H, Ar-H), 6.96 (dd,  $J$  = 2.0, 8.6 Hz, 1H, Ar-H), 6.46 (t,  $J$  = 5.7 Hz, 1H, C=ONH-3), 5.99 (d,  $J$  = 1.7 Hz, 1H, H-3'), 4.78 (d,  $J$  = 5.7 Hz, 2H, C=ONH- $CH_2$ ), 2.02-2.07 (m, 3H, Ad-H), 1.92-1.97 (m, 6H, Ad-H), 1.72-1.79 (m, 6H, Ad-H);  $^{13}C$  NMR (150MHz, DMSO- $d_6$ ):  $\delta$  156.2 (C=O), 150.5 (C-2'), 136.3 (Ar-C), 133.8 (Ar-C), 132.5 (Ar-C), 132.3 (Ar-C), 131.4 (Ar-C), 129.0 (Ar-C), 128.4 (Ar-C), 127.9 (Ar-CH), 126.7 (Ar-CH), 126.3 (Ar-CH), 126.0 (Ar-CH), 125.8 (Ar-CH), 124.0 (Ar-CH), 114.0 (Ar-CH), 111.0 (Ar-CH), 109.7 (Ar-CH), 95.2 (C-3'), 42.3 (Ad-C), 41.3 (C=ONH- $CH_2$ ), 36.8 (s, 3C, Ad-C), 33.9 (s, 3C, Ad-C), 28.4 (s, 3C, Ad-C); ESI-HRMS (+):  $m/z$   $[M+H]^+$  calculated for  $C_{30}H_{32}N_3O^+$ , 450.2540, found 450.2535;  $[M+Na]^+$  calculated for  $C_{30}H_{31}N_3ONa^+$ , 472.2359, found 472.2355.

**1-(2-adamantine-1H-indol-5-yl)-3-(3-morpholinopropyl) urea (7j):** White solid; yield: 89.6%; mp: 202.5-204.5 °C; HPLC purity: 95.2% ( $t_R$  = 18.67 min);  $^1H$  NMR (600 MHz, DMSO- $d_6$ ):  $\delta$  10.63 (d,  $J$  = 1.3 Hz, 1H, NH-1), 8.24 (s, 1H, C=ONH-1), 7.47 (d,  $J$  = 1.8 Hz, 1H, Ar-H), 7.14 (d,  $J$  = 8.6 Hz, 1H, Ar-H), 6.93 (dd,  $J$  = 2.0, 8.6 Hz, 1H, Ar-H), 5.97 (d,  $J$  = 1.7 Hz, 1H, H-3'), 5.90 (t,  $J$  = 5.4 Hz, 1H, C=ONH-3), 3.56-3.62 (m, 4H, morpholinyl-H), 3.20 (q,  $J$  = 6.2 Hz, 2H, C=ONH- $CH_2$ ), 2.34-2.44 (m, 6H), 2.02-2.07 (m, 3H, Ad-H), 1.92-1.97 (m, 6H, Ad-H), 1.72-1.79 (m, 6H, Ad-H);  $^{13}C$  NMR (150 MHz, DMSO- $d_6$ ):  $\delta$  156.3 (C=O), 150.4 (C-2'), 132.44 (Ar-C), 132.43 (Ar-C), 128.4 (Ar-C), 113.9 (Ar-CH), 110.9 (Ar-CH), 109.6 (Ar-CH), 95.2 (C-3'), 66.7 (s, 2C, morpholinyl-C), 58.5 (s, 2C, morpholinyl-C), 53.7 (N- $CH_2$ ), 42.3 (Ad-C), 36.8 (s, 3C, Ad-C), 36.5 (C=ONH- $CH_2$ ), 33.9 (s, 3C, Ad-C), 28.4 (s, 3C, Ad-C); ESI-HRMS (+):  $m/z$   $[M+H]^+$  calculated for  $C_{25}H_{35}N_4O_2^+$ , 423.2755, found 423.2750;  $[M+Na]^+$  calculated for  $C_{25}H_{34}N_4O_2Na^+$ , 445.2574, found 445.2569.

**1-(2-adamantine-1H-indol-5-yl)-3-o-tolylurea (7k):** White solid; yield: 92.5%; mp: 262-263 °C; HPLC purity: 96.6% ( $t_R = 19.56$  min);  $^1\text{H}$  NMR (600 MHz, DMSO- $d_6$ ):  $\delta$  10.71 (s, 1H, NH-1), 8.72 (s, 1H, C=ONH-1), 7.91 (d,  $J = 7.9$  Hz, 1H, C=ONH-3), 7.77 (s, 1H, Ar-H), 7.59 (d,  $J = 1.7$  Hz, 1H, Ar-H), 7.21 (d,  $J = 8.4$  Hz, 1H, Ar-H), 7.12-7.18 (m, 2H, Ar-H), 7.02 (dd,  $J = 2.0, 8.6$  Hz, 1H, Ar-H), 6.91 (t,  $J = 7.4$  Hz, 1H, Ar-H), 6.03 (d,  $J = 1.7$  Hz, 1H, H-3'), 2.25 (s, 3H, Ph- $\text{CH}_3$ ), 2.02-2.07 (m, 3H, Ad-H), 1.92-1.97 (m, 6H, Ad-H), 1.72-1.79 (m, 6H, Ad-H);  $^{13}\text{C}$ -NMR (150 MHz, DMSO- $d_6$ ):  $\delta$  153.5 (C=O), 150.6 (C-2'), 138.4 (Ar-C), 132.7 (Ar-C), 131.7 (Ar-C), 130.6 (Ar-C), 128.4 (Ar-C), 127.3 (Ar-CH), 126.6 (Ar-CH), 122.5 (Ar-CH), 121.0 (Ar-CH), 113.9 (Ar-CH), 111.1 (Ar-CH), 109.8 (Ar-CH), 95.4 (C-3'), 42.3 (Ad-C), 36.8 (s, 3C, Ad-C), 33.9 (s, 3C, Ad-C), 28.4 (s, 3C, Ad-C), 18.4 (Ph- $\text{CH}_3$ ); ESI-HRMS (+):  $m/z$  [M+H] $^+$  calculated for  $\text{C}_{26}\text{H}_{30}\text{N}_3\text{O}^+$ , 400.2383, found 400.2380; [M+Na] $^+$  calculated for  $\text{C}_{26}\text{H}_{29}\text{N}_3\text{ONa}^+$ , 422.2203, found 422.2198.

**1-(2-adamantine-1H-indol-5-yl)-3-p-tolylurea (7l):** White solid; yield: 89.5%; mp: 317-319 °C; HPLC purity: 98.36% ( $t_R = 19.80$  min);  $^1\text{H}$  NMR (600 MHz, DMSO- $d_6$ ):  $\delta$  10.69 (s, 1H, NH-1), 8.38 (s, 1H, C=ONH-1), 8.27 (s, 1H, C=ONH-3), 7.54 (d,  $J = 1.7$  Hz, 1H, Ar-H), 7.33 (d,  $J = 8.4$  Hz, 2H, Ar-H), 7.18 (d,  $J = 8.6$  Hz, 1H, Ar-H), 7.06 (d,  $J = 8.1$  Hz, 2H, Ar-H), 6.98 (dd,  $J = 1.9, 8.5$  Hz, 1H, Ar-H), 6.01 (d,  $J = 1.7$  Hz, 1H, H-3'), 2.23 (s, 3H, Ph- $\text{CH}_3$ ), 2.02-2.07 (m, 3H, Ad-H), 1.92-1.97 (m, 6H, Ad-H), 1.72-1.79 (m, 6H, Ad-H);  $^{13}\text{C}$  NMR (150 MHz, DMSO- $d_6$ ):  $\delta$  153.5 (C=O), 150.6 (C-2'), 138.1 (Ar-C), 132.7 (Ar-C), 131.6 (Ar-C), 130.6 (Ar-C), 129.6 (s, 2C, C-3'', 5''), 128.4 (Ar-C), 118.5 (s, 2C, C-2'', 6''), 114.1 (Ar-CH), 111.0 (Ar-CH), 110.0 (Ar-CH), 95.3 (C-3'), 42.3 (Ad-C), 36.8 (s, 3C, Ad-C), 33.9 (s, 3C, Ad-C), 28.4 (s, 3C, Ad-C), 20.8 (Ph- $\text{CH}_3$ ); ESI-HRMS (+):  $m/z$  [M+H] $^+$  calculated for  $\text{C}_{26}\text{H}_{30}\text{N}_3\text{O}^+$ , 400.2383, found 400.2382; [M+Na] $^+$  calculated for  $\text{C}_{26}\text{H}_{29}\text{N}_3\text{ONa}^+$ , 422.2203, found 422.2201.

**1-(4-methoxyphenyl)-3-(2-adamantine-1H-indol-5-yl)urea (7m):** White solid; yield: 92.0%; mp: 315-318 °C; HPLC purity: 96.6% ( $t_R = 17.69$  min);  $^1\text{H}$  NMR (600 MHz, DMSO- $d_6$ ):  $\delta$  10.68 (s, 1H, NH-1), 8.30 (s, 1H, C=ONH-1), 8.22 (s, 1H, C=ONH-3), 7.53 (d,  $J = 1.7$  Hz, 1H, Ar-H), 7.33-7.36 (m, 2H, Ar-H), 7.18 (d,  $J = 8.6$  Hz, 1H, Ar-H), 6.98 (dd,  $J = 1.9, 8.5$  Hz, 1H, Ar-H), 6.83-6.87 (m, 2H, Ar-H), 6.00 (d,  $J = 1.7$  Hz, 1H, H-3'), 3.71 (s, 3H,  $\text{OCH}_3$ ), 2.02-2.07 (m, 3H, Ad-H), 1.92-1.97 (m, 6H, Ad-H), 1.72-1.79 (m, 6H, Ad-H);  $^{13}\text{C}$  NMR (150 MHz, DMSO- $d_6$ ):  $\delta$  154.6 (C-4''), 153.7 (C=O), 150.6 (C-2'), 133.8 (Ar-C), 132.7 (Ar-C), 131.7 (Ar-C), 128.4 (Ar-C), 120.2 (s, 2C, C-2'', 6''), 114.4 (s, 2C, C-3'', 5''), 114.1 (Ar-CH), 111.0 (Ar-CH), 110.0 (Ar-CH), 95.3 (C-3'), 55.6 (Ph- $\text{OCH}_3$ ), 42.3 (Ad-C), 36.8 (s, 3C, Ad-C), 33.9 (s, 3C, Ad-C), 28.4 (s, 3C, Ad-C); ESI-HRMS (+):  $m/z$  [M+H] $^+$  calculated for  $\text{C}_{26}\text{H}_{30}\text{N}_3\text{O}_2^+$ , 416.2333, found 416.2329; [M+Na] $^+$  calculated for  $\text{C}_{26}\text{H}_{29}\text{N}_3\text{O}_2\text{Na}^+$ , 438.2152, found 438.2148.

**1-(2,4-dimethylphenyl)-3-(2-adamantine-1H-indol-5-yl)urea (7o):** White solid; yield: 89.5%; mp: 271-273 °C; HPLC purity: 96.9% ( $t_R = 19.60$  min);  $^1\text{H}$  NMR (600 MHz, DMSO- $d_6$ ):  $\delta$  10.69 (s, 1H, NH-1), 8.31 (s, 1H, C=ONH-1), 8.26 (s, 1H, C=ONH-3), 7.54 (d,  $J = 1.7$  Hz, 1H, Ar-H), 7.23 (d,  $J = 1.5$  Hz, 1H, Ar-H), 7.18 (d,  $J = 8.4$  Hz, 1H, Ar-H), 7.16 (dd,  $J = 2.0, 8.3$  Hz, 1H, Ar-H), 7.00 (d,  $J = 8.3$  Hz, 1H, Ar-H), 6.98 (dd,  $J = 2.0, 8.6$  Hz, 1H, Ar-H), 6.00 (d,  $J = 1.5$  Hz, 1H, H-3'), 2.18 (s, 3H, Ph- $\text{CH}_3$ ), 2.15 (s, 3H, Ph- $\text{CH}_3$ ), 2.02-2.07 (m, 3H, Ad-H), 1.92-1.97 (m, 6H, Ad-H), 1.72-1.79 (m, 6H, Ad-H);

<sup>13</sup>C NMR (150 MHz, DMSO-*d*<sub>6</sub>): δ 153.5 (C=O), 150.6 (C-2'), 138.3 (Ar-C), 136.7 (Ar-C), 132.7 (Ar-C), 131.6 (Ar-C), 130.1 (Ar-CH), 129.4 (Ar-C), 128.4 (Ar-C), 119.8 (Ar-CH), 116.0 (Ar-CH), 114.0 (Ar-CH), 111.0 (Ar-CH), 110.0 (Ar-CH), 95.3 (C-3'), 42.3 (Ad-C), 36.8 (s, 3C, Ad-C), 33.9 (s, 3C, Ad-C), 28.4 (s, 3C, Ad-C), 20.1 (Ph-CH<sub>3</sub>), 19.1 (Ph-CH<sub>3</sub>); ESI-HRMS (+): *m/z* [M+H]<sup>+</sup> calculated for C<sub>27</sub>H<sub>32</sub>N<sub>3</sub>O<sup>+</sup>, 414.2540, found 414.2541; [M+Na]<sup>+</sup> calculated for C<sub>27</sub>H<sub>31</sub>N<sub>3</sub>ONa<sup>+</sup>, 436.2359, found 436.2359.

**1-(5-methoxy-2-methylphenyl)-3-(2-adamantine-1H-indol-5-yl)urea (7p):** Purple solid; yield: 89.6%; mp: 285-287 °C; HPLC purity: 95.9% (*t*<sub>R</sub> = 15.60 min); <sup>1</sup>H NMR (600 MHz, DMSO-*d*<sub>6</sub>): δ 10.68 (s, 1H, NH-1), 8.51 (s, 1H, C=ONH-1), 7.62 (s, 1H, C=ONH-3), 7.59 (d, *J* = 8.8 Hz, 1H, Ar-H), 7.54 (d, *J* = 1.3 Hz, 1H, Ar-H), 7.18 (d, *J* = 8.4 Hz, 1H, Ar-H), 6.99 (dd, *J* = 8.6, 1.8 Hz, 1H, Ar-H), 6.77 (d, *J* = 2.8 Hz, 1H, Ar-H), 6.71 (dd, *J* = 8.8, 2.9 Hz, 1H, Ar-H), 6.00 (d, *J* = 1.5 Hz, 1H, H-3'), 3.71 (s, 3H, Ph-OCH<sub>3</sub>), 2.22 (s, 3H, Ph-CH<sub>3</sub>), 2.02-2.07 (m, 3H, Ad-H), 1.92-1.97 (m, 6H, Ad-H), 1.72-1.79 (m, 6H, Ad-H); <sup>13</sup>C NMR (150 MHz, DMSO-*d*<sub>6</sub>): δ 155.4 (C-4''), 154.0 (C=O), 150.6 (C-2'), 132.6 (Ar-C), 132.0 (Ar-C), 131.3 (Ar-CH), 130.7 (Ar-C), 128.4 (Ar-C), 124.0 (Ar-C), 115.9 (Ar-CH), 113.9 (Ar-CH), 111.6 (Ar-CH), 111.0 (Ar-CH), 109.7 (Ar-CH), 95.3 (C-3'), 55.6 (Ph-OCH<sub>3</sub>), 42.3 (Ad-C), 36.8 (s, 3C, Ad-C), 33.9 (s, 3C, Ad-C), 28.4 (s, 3C, Ad-C), 18.6 (Ph-CH<sub>3</sub>); ESI-HRMS (+): *m/z* [M+H]<sup>+</sup> calculated for C<sub>27</sub>H<sub>32</sub>N<sub>3</sub>O<sub>2</sub><sup>+</sup>, 430.2489, found 430.2490; [M+Na]<sup>+</sup> calculated for C<sub>27</sub>H<sub>31</sub>N<sub>3</sub>O<sub>2</sub>Na<sup>+</sup>, 452.2308, found 452.2308.

**1-(4-fluoro-2-methylphenyl)-3-(2-adamantine-1H-indol-5-yl)urea (7q):** White solid; yield: 91.2%; mp: 270-271 °C; HPLC purity: 97.9% (*t*<sub>R</sub> = 19.10 min); <sup>1</sup>H NMR (600 MHz, DMSO-*d*<sub>6</sub>): δ 10.71 (s, 1H, NH-1), 8.65 (s, 1H, C=ONH-1), 7.82 (dd, *J* = 5.7, 9.0 Hz, 1H, Ar-H), 7.78 (s, 1H, C=ONH-3), 7.57 (d, *J* = 1.7 Hz, 1H, Ar-H), 7.20 (d, *J* = 8.6 Hz, 1H, Ar-H), 7.04 (dd, *J* = 2.8, 9.6 Hz, 1H, Ar-H), 7.01 (dd, *J* = 1.9, 8.5 Hz, 1H, Ar-H), 6.97 (dt, *J* = 3.0, 8.7 Hz, 1H, Ar-H), 6.02 (d, *J* = 1.7 Hz, 1H, H-3'), 2.26 (s, 3H, Ph-CH<sub>3</sub>), 2.03-2.08 (m, 3H, Ad-H), 1.92-1.98 (m, 6H, Ad-H), 1.72-1.80 (m, 6H, Ad-H); <sup>13</sup>C NMR (150 MHz, DMSO-*d*<sub>6</sub>): δ 158.0 (d, *J* = 237.7 Hz, Ar-CF), 153.7 (C=O), 150.7 (C-2'), 134.6 (d, *J* = 2.2 Hz, C-1''), 132.7 (Ar-C), 131.7 (Ar-C), 130.7 (d, *J* = 7.7 Hz, C-2''), 128.4 (Ar-C), 123.2 (d, *J* = 8.8 Hz, C-6''), 116.8 (d, *J* = 22.1 Hz, C-3''), 114.0 (Ar-CH), 112.8 (d, *J* = 22.1 Hz, C-5''), 111.1 (Ar-CH), 109.9 (Ar-CH), 95.3 (C-3'), 42.3 (Ad-C), 36.8 (s, 3C, Ad-C), 33.9 (s, 3C, Ad-C), 28.4 (s, 3C, Ad-C), 18.3 (Ph-CH<sub>3</sub>); ESI-HRMS (+): *m/z* [M+H]<sup>+</sup> calculated for C<sub>26</sub>H<sub>29</sub>FN<sub>3</sub>O<sup>+</sup>, 418.2289, found 418.2290, [M+Na]<sup>+</sup> calculated for C<sub>26</sub>H<sub>28</sub>FN<sub>3</sub>ONa<sup>+</sup>, 440.2109, found 440.2107.

**1-(4-bromo-2-methylphenyl)-3-(2-adamantine-1H-indol-5-yl)urea (7r):** White solid; yield: 89.6%; mp: 278-279 °C; HPLC purity: 96.1% (*t*<sub>R</sub> = 22.10 min); <sup>1</sup>H NMR (600 MHz, DMSO-*d*<sub>6</sub>): δ 10.71 (d, *J* = 1.3 Hz, 1H, NH-1), 8.78 (s, 1H, C=ONH-1), 7.93 (d, *J* = 8.8 Hz, 1H, Ar-H), 7.84 (s, 1H, C=ONH-1), 7.57 (d, *J* = 1.8 Hz, 1H, Ar-H), 7.37 (d, *J* = 2.0 Hz, 1H, Ar-H), 7.30 (dd, *J* = 2.4, 8.6 Hz, 1H, Ar-H), 7.20 (d, *J* = 8.4 Hz, 1H, Ar-H), 7.00 (dd, *J* = 2.0, 8.6 Hz, 1H, Ar-H), 6.02 (d, *J* = 1.7 Hz, 1H, H-3'), 2.24 (s, 3H, Ph-CH<sub>3</sub>), 2.02-2.08 (m, 3H, Ad-H), 1.93-1.97 (m, 6H, Ad-H), 1.72-1.79 (m, 6H, Ad-H); <sup>13</sup>C NMR (150 MHz, DMSO-*d*<sub>6</sub>): δ 153.3 (C=O), 150.7 (C-2'), 138.0 (Ar-C), 132.81 (Ar-CH), 132.80 (Ar-C), 131.5 (Ar-C), 129.7 (Ar-CH), 129.2 (Ar-CH), 128.4 (Ar-C), 122.3 (Ar-CH), 113.9 (Ar-



CH), 113.8 (C-Br), 111.1 (Ar-CH), 109.9 (Ar-CH), 95.4 (C-3'), 42.3 (Ad-C), 36.8 (s, 3C, Ad-C), 33.9 (s, 3C, Ad-C), 28.4 (s, 3C, Ad-C), 18.1 (Ph-CH<sub>3</sub>); ESI-HRMS (+):  $m/z$  [M+H]<sup>+</sup> calculated for C<sub>26</sub>H<sub>29</sub>BrN<sub>3</sub>O<sup>+</sup>, 478.1489, found 478.1485; [M+Na]<sup>+</sup> calculated for C<sub>26</sub>H<sub>28</sub>BrN<sub>3</sub>ONa<sup>+</sup>, 500.1308, found 500.1305.

**1-(2-fluoro-6-methylphenyl)-3-(1H-indol-2-adamantine-5-yl)urea (7t):** White solid; yield: 91.2%; mp: 280-281 °C; HPLC purity: 96.3% ( $t_R$  = 18.25 min); <sup>1</sup>H NMR (600 MHz, DMSO-d<sub>6</sub>): δ 10.70 (br s, 1H, NH-1), 8.47 (s, 1H, C=ONH-1), 7.73 (s, 1H, C=ONH-3), 7.53 (s, 1H, Ar-H), 7.16-7.21 (m, 2H, Ar-H), 7.07 (d,  $J$  = 8.1 Hz, 2H, Ar-H), 7.01 (dd,  $J$  = 1.7, 8.7 Hz, 1H, Ar-H), 6.01 (s, 1H, H-3'), 2.27 (s, 3H, Ph-CH<sub>3</sub>), 2.03-2.08 (m, 3H, Ad-H), 1.93-1.97 (m, 6H, Ad-H), 1.73-1.80 (m, 6H, Ad-H); <sup>13</sup>C NMR (150 MHz, DMSO-d<sub>6</sub>): δ 158.3 (d,  $J$  = 244.3 Hz, Ar-CF), 153.8 (C=O), 150.6 (C-2'), 138.2 (Ar-C), 132.7 (Ar-C), 131.8 (Ar-C), 128.4 (Ar-C), 126.8 (d,  $J$  = 8.8 Hz, C-4''), 126.1 (d,  $J$  = 3.3 Hz, C-5''), 125.4 (d,  $J$  = 13.2 Hz, C-6''), 114.1 (Ar-CH), 113.4 (d,  $J$  = 20.9 Hz, C-3''), 111.0 (Ar-CH), 110.0 (Ar-CH), 95.3 (C-3'), 42.3 (Ad-C), 36.8 (s, 3C, Ad-C), 33.9 (s, 3C, Ad-C), 28.4 (s, 3C, Ad-C), 18.3 (Ph-CH<sub>3</sub>); ESI-HRMS (+):  $m/z$  [M+H]<sup>+</sup> calculated for C<sub>26</sub>H<sub>29</sub>FN<sub>3</sub>O<sup>+</sup>, 418.2289, found 418.2287; [M+Na]<sup>+</sup> calculated for C<sub>26</sub>H<sub>28</sub>FN<sub>3</sub>ONa<sup>+</sup>, 440.2109, found 440.2103.

**1-(4-bromo-2-fluorophenyl)-3-(1H-indol-2-adamantine-5-yl)urea (7u):** Pale yellow solid; yield: 87.7%; mp: 210-212 °C; HPLC purity: 98.6% ( $t_R$  = 13.68 min); <sup>1</sup>H NMR (600MHz, DMSO-d<sub>6</sub>): δ 10.75 (d,  $J$  = 1.5 Hz, 1H, NH-1), 8.86 (s, 1H, C=ONH-1), 8.62 (d,  $J$  = 2.8 Hz, 1H, C=ONH-3), 8.48 (dd,  $J$  = 2.5, 7.2 Hz, 1H, Ar-H), 7.59 (d,  $J$  = 1.8 Hz, 1H, Ar-H), 7.20-7.24 (m, 2H, Ar-H), 7.11-7.15 (m, 1H, Ar-H), 6.99 (dd,  $J$  = 2.1, 8.5 Hz, 1H, Ar-H), 6.03 (d,  $J$  = 1.7 Hz, 1H, H-3'), 2.03-2.08 (m, Ad-H), 1.93-1.98 (m, 6H, Ad-H), 1.72-1.80 (m, 6H, Ad-H); <sup>13</sup>C NMR (150 MHz, DMSO-d<sub>6</sub>): δ 152.7 (C=O), 151.9 (d,  $J$  = 241.0 Hz, Ar-CF), 150.8 (C-2'), 133.0 (Ar-C), 130.9 (Ar-C), 130.3 (d,  $J$  = 12.1 Hz, C-1''), 128.4 (Ar-C), 124.3 (d,  $J$  = 7.7 Hz, C-4''), 122.3 (Ar-CH), 117.2 (d,  $J$  = 20.9 Hz, C-3''), 116.7 (d,  $J$  = 3.3 Hz, C-5''), 113.9 (Ar-CH), 111.2 (Ar-CH), 110.1 (Ar-CH), 95.4 (C-3'), 42.3 (Ad-C), 36.8 (s, 3C, Ad-C), 33.9 (s, 3C, Ad-C), 28.4 (s, 3C, Ad-C); ESI-HRMS (+):  $m/z$  [M+H]<sup>+</sup> calculated for C<sub>25</sub>H<sub>26</sub>BrFN<sub>3</sub>O<sup>+</sup>, 482.1238, found 482.1242; [M+Na]<sup>+</sup> calculated for C<sub>25</sub>H<sub>25</sub>BrFN<sub>3</sub>ONa<sup>+</sup>, 504.1057, found 504.1058.

**1-(2-fluoro-4-iodophenyl)-3-(1H-indol-2-adamantine-5-yl)urea (7v):** White solid; yield: 87.3%; mp: 278-281 °C; HPLC purity: 97.2% ( $t_R$  = 14.90 min); <sup>1</sup>H NMR (600 MHz, DMSO-d<sub>6</sub>): δ 10.74 (d,  $J$  = 1.1 Hz, 1H, NH-1), 8.80 (s, 1H, C=ONH-1), 8.50 (d,  $J$  = 2.6 Hz, 1H, C=ONH-3), 8.05 (t,  $J$  = 8.6 Hz, 1H, Ar-H), 7.62 (dd,  $J$  = 1.8, 10.6 Hz, 1H, Ar-H), 7.57 (d,  $J$  = 1.8 Hz, 1H, Ar-H), 7.48 (d,  $J$  = 8.6 Hz, 1H, Ar-H), 7.20 (d,  $J$  = 8.6 Hz, 1H, Ar-H), 6.99 (dd,  $J$  = 2.0, 8.6 Hz, 1H, Ar-H), 6.03 (d,  $J$  = 1.7 Hz, 1H, H-3'), 2.03-2.08 (m, 3H, Ad-H), 1.93-1.98 (m, 6H, Ad-H), 1.72-1.80 (m, 6H, Ad-H); <sup>13</sup>C NMR (150 MHz, DMSO-d<sub>6</sub>): δ 152.8 (C=O), 152.0 (d,  $J$  = 245.4 Hz, Ar-CF), 150.8 (C-2'), 133.8 (d,  $J$  = 3.3 Hz, C-5''), 132.9 (Ar-C), 131.0 (Ar-C), 128.7 (d,  $J$  = 9.9 Hz, C-1''), 128.4 (Ar-C), 123.8 (d,  $J$  = 9.9 Hz, C-3''), 122.2 (Ar-C), 113.9 (Ar-CH), 111.2 (Ar-CH), 110.0 (Ar-CH), 95.4 (C-3'), 83.2 (d,  $J$  = 7.7 Hz, C-4''), 42.3 (Ad-C), 36.8 (s, 3C, Ad-C), 33.9 (s, 3C, Ad-C), 28.4 (s, 3C, Ad-C); ESI-HRMS (+):  $m/z$  [M+H]<sup>+</sup> calculated for C<sub>25</sub>H<sub>26</sub>FIN<sub>3</sub>O<sup>+</sup>, 530.1099, found 530.1102; [M+Na]<sup>+</sup> calculated for C<sub>25</sub>H<sub>25</sub>FIN<sub>3</sub>ONa<sup>+</sup>, 552.0919, found 552.0920.

**1-(2-adamantine-1H-indol-5-yl)-3-(pyridin-3-yl)urea (7x):** Pale yellow solid; yield: 85.6%; mp: 250-252 °C; HPLC purity: 99.16% ( $t_R = 20.67$  min);  $^1\text{H}$  NMR (600 MHz, DMSO- $d_6$ ):  $\delta$  10.74 (s, 1H, NH-1), 8.71 (s, 1H, C=ONH-1), 8.60 (d,  $J = 2.4$  Hz, 1H, C=ONH-3), 8.47 (s, 1H, Py-H), 8.16 (d,  $J = 1.2, 4.7$  Hz, 1H, Py-H), 7.93-7.97 (m, 1H, Py-H), 7.55 (d,  $J = 1.5$  Hz, 1H, Ar-H), 7.29 (dd,  $J = 4.6, 8.3$  Hz, 1H, Py-H), 7.21 (d,  $J = 8.4$  Hz, 1H, Ar-H), 7.01 (dd,  $J = 2.0, 8.6$  Hz, 1H, Ar-H), 6.03 (s, 1H, H-3'), 2.03-2.08 (m, 3H, Ad-H), 1.94-1.97 (m, 6H, Ad-H), 1.72-1.79 (m, 6H, Ad-H);  $^{13}\text{C}$  NMR (150 MHz, DMSO- $d_6$ ):  $\delta$  153.5 (C=O), 150.8 (C-2'), 142.9 (Py-C), 140.3 (Py-C), 137.4 (Py-C), 133.0 (Ar-C), 131.1 (Ar-C), 128.4 (Ar-C), 125.3 (Py-C), 124.0 (Py-C), 114.3 (Ar-CH), 111.1 (Ar-CH), 110.5 (Ar-CH), 94.9 (C-3'), 42.3 (Ad-C), 36.8 (s, 3C, Ad-C), 33.9 (s, 3C, Ad-C), 28.4 (s, 3C, Ad-C); ESI-HRMS (+):  $m/z$  [M+H] $^+$  calculated for  $\text{C}_{24}\text{H}_{27}\text{N}_4\text{O}^+$ , 387.2179, found 387.2174; [M+Na] $^+$  calculated for  $\text{C}_{24}\text{H}_{26}\text{N}_4\text{ONa}^+$ , 409.1999, found 409.1994.

**1-(2-adamantine-1H-indol-5-yl)-3-(pyrimidin-2-yl)urea (7y):** Pale yellow solid; yield: 85.3%; mp: 207-210 °C; HPLC purity: 90.5% ( $t_R = 19.78$  min);  $^1\text{H}$  NMR (600 MHz, DMSO- $d_6$ ):  $\delta$  10.76 (s, 1H, NH-1), 8.92 (s, 1H, C=ONH-1), 8.87 (s, 1H, C=ONH-3), 8.77-8.81 (m, 1H), 8.10 (s, 1H), 7.56 (s, 1H, Ar-H), 7.23 (d,  $J = 8.6$  Hz, 1H, Ar-H), 7.03 (dd,  $J = 1.9, 8.5$  Hz, 1H, Ar-H), 6.04 (d,  $J = 1.5$  Hz, 1H, H-3'), 2.03-2.08 (m, 3H, Ad-H), 1.93-1.98 (m, 6H, Ad-H), 1.72-1.80 (m, 6H, Ad-H);  $^{13}\text{C}$  NMR (150 MHz, DMSO- $d_6$ ):  $\delta$  153.2 (C=O), 151.9 (pyrimidinyl-C), 150.8 (C-2'), 146.6 (s, 2C, pyrimidinyl-C), 141.9 (pyrimidinyl-C), 133.1 (Ar-C), 130.8 (Ar-C), 128.4 (Ar-C), 114.5 (Ar-CH), 111.1 (Ar-CH), 110.8 (Ar-CH), 95.4 (C-3'), 42.3 (Ad-C), 36.8 (s, 3C, Ad-C), 33.9 (s, 3C, Ad-C), 28.4 (s, 3C, Ad-C); ESI-HRMS (+):  $m/z$  [M+H] $^+$  calculated for  $\text{C}_{23}\text{H}_{26}\text{N}_5\text{O}^+$ , 388.2132, found 388.2129; [M+Na] $^+$  calculated for  $\text{C}_{23}\text{H}_{25}\text{N}_5\text{ONa}^+$ , 410.1951, found 410.1951.

**1-cyclobutyl-3-(2-adamantane-1H-indol-5-yl)thiourea (9b):** White solid; yield: 85.6%; mp: 280-281 °C; HPLC purity: 97.6% ( $t_R = 16.50$  min);  $^1\text{H}$  NMR (600 MHz, DMSO- $d_6$ ):  $\delta$  10.91 (br s, 1H, NH-1), 9.36 (br s, 1H, C=SNH-1), 8.12 (br s, 1H, C=SNH-3), 7.33 (s, 1H, Ar-H), 7.25 (d,  $J = 8.4$  Hz, 1H, Ar-H), 6.87 (dd,  $J = 1.7, 8.4$  Hz, 1H, Ar-H), 6.07 (d,  $J = 1.5$ , 1H, H-3'), 4.60-4.77 (m, 1H, cyclobutyl-H), 2.16-2.24 (m, 2H, cyclobutyl-H), 2.03-2.08 (m, 3H, Ad-H), 1.94-1.99 (m, 6H, Ad-H), 1.85-1.93 (m, 2H, cyclobutyl-H), 1.72-1.81 (m, 6H, Ad-H), 1.56-1.63 (m, 2H, cyclobutyl-H);  $^{13}\text{C}$  NMR (150 MHz, DMSO- $d_6$ ):  $\delta$  180.1 (C=S), 151.0 (C-2'), 134.4 (Ar-C), 129.4 (Ar-C), 128.7 (Ar-C), 128.3 (Ar-CH), 125.8 (Ar-CH), 111.2 (Ar-CH), 95.7 (C-3'), 45.0 (cyclobutyl-C), 42.3 (Ad-C), 36.8 (s, 3C, Ad-C), 33.9 (s, 3C, Ad-C), 31.8 (cyclobutyl-C), 30.6 (cyclobutyl-C), 28.4 (s, 3C, Ad-C), 27.6 (cyclobutyl-C); ESI-HRMS (+):  $m/z$  [M+H] $^+$  calculated for  $\text{C}_{23}\text{H}_{30}\text{N}_3\text{S}^+$ , 380.2155, found 380.2153; [M+Na] $^+$  calculated for  $\text{C}_{23}\text{H}_{29}\text{N}_3\text{SNa}^+$ , 402.1974, found 402.1973.

**1-butyl-3-(2-adamantane-1H-indol-5-yl)thiourea (9c):** White solid; yield: 91.8%; mp: 238-240 °C; HPLC purity: 97.3% ( $t_R = 22.35$  min);  $^1\text{H}$  NMR (600 MHz, DMSO- $d_6$ ):  $\delta$  10.91 (br s, 1H, NH-1), 9.25 (br s, 1H, C=SNH-1), 7.26-7.32 (m, 2H), 7.10-7.20 (m, 1H, Ar-H), 6.83 (d,  $J = 8.4$  Hz, 1H, Ar-H), 6.08 (d,  $J = 1.7$  Hz, 1H, H-3'), 3.41-3.47 (m, 2H, butyl-H), 2.04-2.09 (m, 3H, Ad-H), 1.94-1.98 (m, 6H, Ad-H), 1.72-1.81 (m, 6H, Ad-H), 1.48 (quin,  $J = 7.3$  Hz, 2H, butyl-H), 1.27 (sxt,  $J = 7.3$  Hz, 2H, butyl-H), 0.89 (t,  $J = 7.3$  Hz, 3H, butyl-H);  $^{13}\text{C}$  NMR (150 MHz, DMSO- $d_6$ ):  $\delta$  181.0 (C=S), 151.1 (C-

2'), 134.6 (Ar-C), 128.7 (Ar-C), 128.4 (Ar-C), 119.0 (Ar-CH), 116.8 (Ar-CH), 111.5 (Ar-CH), 95.8 (C-3'), 44.2 (butyl-C), 42.2 (Ad-C), 36.8 (s, 3C, Ad-C), 33.9 (s, 3C, Ad-C), 31.4 (butyl-C), 28.4 (s, 3C, Ad-C), 20.0 (butyl-C), 14.2 (butyl-C); ESI-HRMS (+):  $m/z$   $[M+H]^+$  calculated for  $C_{23}H_{32}N_3S^+$ , 382.2311, found 382.2309;  $[M+Na]^+$  calculated for  $C_{23}H_{31}N_3SNa^+$ , 404.2131, found 404.2129.

**1-hexyl-3-(2-adamantane-1H-indol-5-yl)thiourea (9d):** White solid; yield: 91.3%; mp: 208-210 °C; HPLC purity: 98.3% ( $t_R$  = 22.67 min);  $^1H$  NMR (600 MHz, DMSO- $d_6$ ):  $\delta$  10.91 (br s, 1H, NH-1), 9.25 (br s, 1H, C=SNH-1), 7.23-7.33 (m, 2H), 7.11-7.21 (m, 1H, Ar-H), 6.83 (d,  $J$  = 8.4 Hz, 1H, Ar-H), 6.08 (d,  $J$  = 1.7 Hz, 1H, H-3'), 3.40-3.46 (m, 2H, hexyl-H), 2.04-2.09 (m, 3H, Ad-H), 1.94-1.98 (m, 6H, Ad-H), 1.72-1.80 (m, 6H, Ad-H), 1.45-1.52 (m, 2H, hexyl-H), 1.22-1.32 (m, 6H, hexyl-H), 0.87 (t,  $J$  = 7.0 Hz, 3H, hexyl-H);  $^{13}C$  NMR (150 MHz, DMSO- $d_6$ ):  $\delta$  181.0 (C=S), 151.1 (C-2'), 134.6 (Ar-C), 129.4 (Ar-C), 128.4 (Ar-C), 119.1 (Ar-CH), 116.8 (Ar-CH), 111.5 (Ar-CH), 95.8 (C-3'), 44.5 (hexyl-C), 42.2 (Ad-C), 36.8 (s, 3C, Ad-C), 33.9 (s, 3C, Ad-C), 31.7 (hexyl-C), 29.1 (hexyl-C), 28.4 (s, 3C, Ad-C), 26.5 (hexyl-C), 22.5 (hexyl-C), 14.4 (hexyl-C); ESI-HRMS (+):  $m/z$   $[M+H]^+$  calculated for  $C_{25}H_{36}N_3S^+$ , 410.2624, found 410.2621;  $[M+Na]^+$  calculated for  $C_{25}H_{35}N_3SNa^+$ , 432.2444, found 432.2443.

**1-cycloheptyl-3-(2-adamantane-1H-indol-5-yl)thiourea (9e):** White solid; yield: 89.4%; mp: 289-291 °C; HPLC purity: 97.3% ( $t_R$  = 18.90 min);  $^1H$  NMR (600 MHz, DMSO- $d_6$ ):  $\delta$  10.89 (s, 1H, NH-1), 9.18 (s, 1H, C=SNH-1), 7.32 (d,  $J$  = 1.3 Hz, 1H, Ar-H), 7.25 (d,  $J$  = 8.4 Hz, 1H, Ar-H), 6.98 (br s, H, C=SNH-3), 6.86 (dd,  $J$  = 1.9, 8.5 Hz, 1H, Ar-H), 6.07 (d,  $J$  = 1.7 Hz, 1H, H-3'), 4.35-4.45 (m, 1H, cycloheptyl-H), 2.04-2.09 (m, 3H, Ad-H), 1.94-1.98 (m, 6H, Ad-H), 1.72-1.80 (m, 6H, Ad-H), 1.43-1.66 (m, 12H, cycloheptyl-H);  $^{13}C$  NMR (150 MHz, DMSO- $d_6$ ):  $\delta$  179.8 (C=S), 151.0 (C-2'), 134.4 (Ar-C), 130.1 (Ar-C), 128.4 (Ar-C), 118.8 (Ar-CH), 116.3 (Ar-CH), 111.3 (Ar-CH), 95.7 (C-3'), 53.9 (cycloheptyl-C), 42.2 (Ad-C), 36.8 (s, 3C, Ad-C), 33.9 (s, 3C, Ad-C), 32.1 (s, 2C, cycloheptyl-C), 28.4 (s, 3C, Ad-C), 27.2 (s, 2C, cycloheptyl-C), 23.9 (s, 2C, cycloheptyl-C); ESI-HRMS (+):  $m/z$   $[M+H]^+$  calculated for  $C_{26}H_{36}N_3S^+$ , 422.2624, found 422.2622;  $[M+Na]^+$  calculated for  $C_{26}H_{35}N_3SNa^+$ , 444.2444, found 444.2446.

**1-(2-adamantane-1H-indol-5-yl)-3-phenethylthiourea (9f):** White solid; yield: 87.6%; mp: 243-245 °C; HPLC purity: 97.3% ( $t_R$  = 18.97 min);  $^1H$  NMR (600 MHz, DMSO- $d_6$ ):  $\delta$  10.91 (br s, 1H, NH-1), 9.37 (br s, 1H, C=SNH-1), 7.26-7.30 (m, 2H, C=SNH-3 and Ar-H), 7.25 (d,  $J$  = 8.3 Hz, 1H, Ar-H), 7.20 (d,  $J$  = 7.3 Hz, 4H, Ar-H), 6.77 (d,  $J$  = 8.3 Hz, 1H, Ar-H), 6.06 (s, 1H, H-3'), 3.60-3.70 (m, 2H, C=SNH- $CH_2$ ), 2.82 (t,  $J$  = 7.4 Hz, 2H, Ph- $CH_2$ ), 2.03-2.08 (m, 3H, Ad-H), 1.93-1.98 (m, 6H, Ad-H), 1.72-1.80 (m, 6H, Ad-H);  $^{13}C$  NMR (150 MHz, DMSO- $d_6$ ):  $\delta$  180.9 (C=S), 151.1 (C-2'), 139.9 (Ar-CH), 134.6 (Ar-C), 129.1 (s, 2C, C-3'',5''), 128.8 (s, 2C, C-2'',6''), 128.5 (Ar-C), 126.5 (Ar-CH), 119.0 (Ar-CH), 116.9 (Ar-CH), 111.5 (Ar-CH), 95.8 (C-3'), 46.0 (C=SNH- $CH_2$ ), 42.3 (Ad-C), 36.8 (s, 3C, Ad-C), 35.2 (Ph- $CH_2$ ), 33.9 (s, 3C, Ad-C), 28.4 (s, 3C, Ad-C); ESI-HRMS (+):  $m/z$  calculated for  $C_{27}H_{32}N_3S^+$ , 430.2311, found 430.2310;  $[M+Na]^+$  calculated for  $C_{27}H_{31}N_3SNa^+$ , 452.2131, found 452.2132.

**1-(2-adamantane-1H-indol-5-yl)-3-(3-phenylpropyl)thiourea (9g):** White solid; yield: 89.4%; mp: 210-212 °C; HPLC purity: 95.9% ( $t_R$  = 19.65 min);  $^1H$  NMR (600 MHz, DMSO- $d_6$ ):  $\delta$  10.92 (br s, 1H, NH-1), 9.31 (br s, 1H, C=SNH-1), 7.25-7.32 (m, 5H), 7.15-7.22 (m, 3H, Ar-H), 6.85 (dd,  $J$  = 1.5, 8.4 Hz, 1H, Ar-H), 6.09 (d,  $J$  = 1.5 Hz, 1H, H-3'), 3.44-3.50 (m, 2H, C=SNH- $CH_2$ ), 2.57 (t,  $J$  = 7.7 Hz, 2H, Ph- $CH_2$ ), 2.03-2.08 (m, 3H, Ad-H), 1.93-1.98 (m, 6H, Ad-H), 1.80-1.84 (m, 2H, Ph- $CH_2CH_2$ ), 1.73-1.80 (m, 6H, Ad-H);  $^{13}C$  NMR (150MHz, DMSO- $d_6$ ):  $\delta$  181.1 (C=S), 151.1 (C-2'), 142.2 (Ar-CH),

134.6 (Ar-C), 128.9 (Ar-C), 128.73 (s, 2C, C-3'',5''), 128.68 (s, 2C, C-2'',6''), 128.4 (Ar-C), 126.2 (Ar-CH), 119.1 (Ar-CH), 116.8 (Ar-CH), 111.5 (Ar-CH), 95.8 (C-3'), 44.2 (C=SNH-CH<sub>2</sub>), 42.2 (Ad-C), 36.8 (s, 3C, Ad-C), 33.9 (s, 3C, Ad-C), 33.1 (Ph-CH<sub>2</sub>), 31.0 (Ph-CH<sub>2</sub>CH<sub>2</sub>), 28.4 (s, 3C, Ad-C); ESI-HRMS (+): *m/z* calculated for C<sub>28</sub>H<sub>34</sub>N<sub>3</sub>S<sup>+</sup>, 444.2468, found 444.2464; [M+Na]<sup>+</sup> calculated for C<sub>28</sub>H<sub>33</sub>N<sub>3</sub>SNa<sup>+</sup>, 466.2287, found 466.2288.

**1-(2-adamantane-1H-indol-5-yl)-3-(2-morpholinoethyl)thiourea (9h):** White solid; yield: 87.6%; mp: 235-237 °C; HPLC purity: 94.6% (*t<sub>R</sub>* = 19.09 min); <sup>1</sup>H NMR (600MHz, DMSO-d<sub>6</sub>): δ 10.96 (br s, 1H, NH-1), 9.50 (br s, 1H, C=SNH-1), 7.27-7.35 (m, 2H, Ar-H), 7.19 (br s, 1H, C=SNH-3), 6.85 (d, *J* = 8.3 Hz, 1H, Ar-H), 6.08 (s, 1H, H-3'), 3.50-3.55 (m, 2H), 3.45-3.49 (m, 4H), 2.32-2.45 (m, 6H), 2.04-2.09 (m, 3H, Ad-H), 1.93-1.98 (m, 6H, Ad-H), 1.72-1.82 (m, 6H, Ad-H); <sup>13</sup>C NMR (150 MHz, DMSO-d<sub>6</sub>): δ 180.7 (C=S), 151.3 (C-2'), 134.6 (Ar-C), 129.6 (Ar-C), 128.5 (Ar-C), 118.8 (Ar-CH), 116.5 (Ar-CH), 111.6 (Ar-CH), 95.7 (C-3'), 66.6 (s, 2C, morpholinyl-C), 55.2 (N-CH<sub>2</sub>), 53.4 (s, 2C, morpholinyl-C), 42.2 (Ad-C), 36.8 (s, 3C, Ad-C), 35.9 (C=SNH-CH<sub>2</sub>), 33.9 (s, 3C, Ad-C), 28.4 (s, 3C, Ad-C); ESI-HRMS (+): *m/z* [M+H]<sup>+</sup> calculated for C<sub>25</sub>H<sub>35</sub>N<sub>4</sub>OS<sup>+</sup>, 439.2526, found 439.2525; [M+Na]<sup>+</sup> calculated for C<sub>25</sub>H<sub>34</sub>N<sub>4</sub>OSNa<sup>+</sup>, 461.2346, found 461.2345.

**1-(2-adamantane-1H-indol-5-yl)-3-(naphthalen-1ylmethyl)thiourea (9i):** White solid; yield: 88.6%; mp: 238-241 °C; HPLC purity: 94.5% (*t<sub>R</sub>* = 19.24 min); <sup>1</sup>H NMR (600 MHz, DMSO-d<sub>6</sub>): δ 10.90 (s, 1H, NH-1), 9.49 (br s, 1H, C=SNH-1), 8.13 (d, *J* = 8.3 Hz, 1H, Ar-H), 7.94 (d, *J* = 7.7 Hz, 1H, Ar-H), 7.83 (d, *J* = 8.1 Hz, 1H, Ar-H), 7.68 (br s, 1H, C=SNH-3), 7.53-7.59 (m, 2H, Ar-H), 7.46-7.50 (m, 1H, Ar-H), 7.43-7.46 (m, 1H Ar-H), 7.36 (s, 1H, Ar-H), 7.26 (d, *J* = 8.4 Hz, 1H, Ar-H), 6.90 (dd, *J* = 1.6, 8.5 Hz, 1H, Ar-H), 6.06 (d, *J* = 1.7 Hz, 1H, H-3'), 5.18 (d, *J* = 5.3 Hz, 2H, CH<sub>2</sub>), 2.02-2.07 (m, 3H, Ad-H), 1.92-1.97 (m, 6H, Ad-H), 1.70-1.80 (m, 6H, Ad-H); <sup>13</sup>C NMR (150 MHz, DMSO-d<sub>6</sub>): δ 181.6 (C=S), 151.0 (C-2'), 134.5 (Ar-C), 134.4 (Ar-C), 133.3 (Ar-C), 129.4 (Ar-C), 128.7 (Ar-C), 128.2 (Ar-C), 125.8 (Ar-CH), 119.3 (Ar-CH), 119.2 (Ar-CH), 117.0 (Ar-CH), 116.7 (Ar-CH), 116.6 (Ar-CH), 111.9 (Ar-CH), 111.1 (Ar-CH), 110.9 (Ar-CH), 110.0 (Ar-CH), 95.7 (C-3'), 55.9 (C=SNH-CH<sub>2</sub>), 42.3 (Ad-C), 36.8 (s, 3C, Ad-C), 33.9 (s, 3C, Ad-C), 28.4 (s, 3C, Ad-C); ESI-HRMS (+): *m/z* [M+H]<sup>+</sup> calculated for C<sub>30</sub>H<sub>32</sub>N<sub>3</sub>S<sup>+</sup>, 466.2311, found 466.2310; [M+Na]<sup>+</sup> calculated for C<sub>30</sub>H<sub>31</sub>N<sub>3</sub>SNa<sup>+</sup>, 488.2131, found 488.2133.

**1-(2-adamantane-1H-indol-5-yl)-3-(2-(pyridin-2-yl)ethyl)thiourea (9j):** White solid; yield: 88.3%; mp: 224-227 °C; HPLC purity: 94.6% (*t<sub>R</sub>* = 16.90 min); <sup>1</sup>H NMR (600 MHz, DMSO-d<sub>6</sub>): δ 10.94 (br s, 1H, NH-1), 9.40 (br s, 1H, C=SNH-1), 8.33 (br s, 1H, C=SNH-3), 7.66-7.74 (m, 1H, Py-H), 7.36-7.44 (m, 1H, Py-H), 7.23-7.28 (m, 2H), 7.16-7.22 (m, 2H), 6.77 (d, *J* = 8.1 Hz, 1H, Ar-H), 6.07 (s, 1H, H-3'), 3.75-3.86 (m, 2H, Py-CH<sub>2</sub>CH<sub>2</sub>), 2.98 (t, *J* = 6.7 Hz, 2H, Py-CH<sub>2</sub>CH<sub>2</sub>), 2.04-2.09 (m, 3H, Ad-H), 1.93-1.99 (br s, 6H, Ad-H), 1.72-1.80 (m, 6H, Ad-H); <sup>13</sup>C NMR (150 MHz, DMSO-d<sub>6</sub>): δ 180.8 (C=S), 159.8 (Py-C), 151.2 (C-2'), 149.3 (Py-C), 137.0 (Py-C), 134.6 (Ar-C), 129.4 (Ar-C), 128.5 (Ar-C), 123.7 (Py-C), 121.9 (Py-C), 119.0 (Ar-CH), 116.8 (Ar-CH), 111.5 (Ar-C), 95.8 (C-3'), 44.2 (Py-CH<sub>2</sub>CH<sub>2</sub>), 42.2 (Ad-C), 37.3 (Py-CH<sub>2</sub>CH<sub>2</sub>), 36.8 (s, 3C, Ad-C), 33.9 (s, 3C, Ad-C), 28.4 (s, 3C, Ad-C);

ESI-HRMS (+):  $m/z$   $[M+H]^+$  calculated for  $C_{26}H_{31}N_4S^+$ , 431.2264, found 431.2264;  $[M+Na]^+$  calculated for  $C_{26}H_{30}N_4SNa^+$ , 453.2083, found 453.2083.

**1-(2-adamantane-1H-indol-5-yl)-3-(2-(thiophen-2-yl)ethyl)thiourea (9k):** White solid; yield: 90.6%; mp: 234-235 °C; HPLC purity: 95.6% ( $t_R$  = 17.90 min);  $^1H$  NMR (600 MHz, DMSO- $d_6$ ):  $\delta$  10.93 (s, 1H, NH-1), 9.43 (br s, 1H, C=SNH-1), 7.34 (dd,  $J$  = 1.0, 5.0 Hz, 1H, thienyl-H), 7.29 (br s, 1H, C=SNH-3), 7.26 (d,  $J$  = 8.4, 1H, Ar-H), 7.21-7.24 (m, 1H, Ar-H), 6.96 (dd,  $J$  = 3.4, 5.0 Hz, 1H, thienyl-H), 6.87 (d,  $J$  = 2.6 Hz, 1H, thienyl-H), 6.80 (dd,  $J$  = 1.1, 8.4 Hz, 1H, Ar-H), 6.08 (d,  $J$  = 1.5 Hz, 1H, H-3'), 3.69 (q,  $J$  = 6.8 Hz, 2H, thienyl- $CH_2CH_2$ ), 3.06 (t,  $J$  = 7.2 Hz, 2H, thienyl- $CH_2CH_2$ ), 2.04-2.09 (m, 3H, Ad-H), 1.93-1.99 (m, 6H, Ad-H), 1.72-1.80 (m, 6H, Ad-H);  $^{13}C$  NMR (150 MHz, DMSO- $d_6$ ):  $\delta$  181.0 (C=S), 151.2 (C-2'), 142.0 (thienyl-C), 134.6 (Ar-C), 129.4 (Ar-C), 128.5 (Ar-C), 127.4 (thienyl-C), 125.6 (thienyl-C), 124.4 (thienyl-C), 119.0 (Ar-CH), 116.8 (Ar-CH), 111.5 (Ar-CH), 95.8 (C-3'), 46.0 (thienyl- $CH_2CH_2$ ), 42.2 (Ad-C), 36.8 (s, 3C, Ad-C), 33.9 (s, 3C, Ad-C), 29.4 (thienyl- $CH_2CH_2$ ), 28.4 (s, 3C, Ad-C); ESI-HRMS (+):  $m/z$   $[M+H]^+$  calculated for  $C_{25}H_{30}N_3S_2^+$ , 436.1876, found 436.1874;  $[M+Na]^+$  calculated for  $C_{25}H_{29}N_3S_2Na^+$ , 458.1695 found 458.1694.

**1-(2,4-dimethylphenyl)-3-(2-adamantane-1H-indol-5-yl)thiourea (9l):** White solid; yield: 88.6%; mp: 242-243 °C; HPLC purity: 95.6% ( $t_R$  = 20.12 min);  $^1H$  NMR (600 MHz, DMSO- $d_6$ ):  $\delta$  10.88 (br s, 1H, NH-1), 9.42 (br s, 1H, C=SNH-1), 8.77 (br s, 1H, C=SNH-3), 7.40 (s, 1H, Ar-H), 7.26 (d,  $J$  = 8.4 Hz, 1H, Ar-H), 7.10 (d,  $J$  = 7.9 Hz, 1H, Ar-H), 7.01 (s, 1H, Ar-H), 6.92-6.98 (m, 2H, Ar-H), 6.08 (s, 1H, H-3'), 2.25 (s, 3H, Ph- $CH_3$ ), 2.19 (s, 3H, Ph- $CH_3$ ), 2.03-2.08 (m, 3H, Ad-H), 1.92-1.98 (m, 6H, Ad-H), 1.72-1.79 (m, 6H, Ad-H);  $^{13}C$  NMR (150 MHz, DMSO- $d_6$ ):  $\delta$  181.2 (C=S), 151.0 (C-2'), 135.8 (Ar-C), 135.1 (Ar-C), 134.6 (Ar-C), 131.2 (Ar-C), 129.4 (Ar-C), 128.7 (Ar-CH), 128.6 (Ar-C), 128.3 (Ar-CH), 126.9 (Ar-CH), 119.2 (Ar-CH), 116.9 (Ar-CH), 111.2 (Ar-CH), 95.8 (C-3'), 42.3 (Ad-C), 36.8 (s, 3C, Ad-C), 33.9 (s, 3C, Ad-C), 28.4 (s, 3C, Ad-C), 21.0 (Ph- $CH_3$ ), 18.3 (Ph- $CH_3$ ); ESI-HRMS (+):  $m/z$   $[M+H]^+$  calculated for  $C_{27}H_{32}N_3S^+$ , 430.2311, found 430.2310;  $[M+Na]^+$  calculated for  $C_{27}H_{31}N_3SNa^+$ , 452.2131, found 452.2134.

**1-(3,4-dimethoxyphenyl)-3-(1H-indol-2-adamantine-5-yl) thiourea (9m):** White solid; yield: 87.6%; mp: 287-289 °C; HPLC purity: 95.1% ( $t_R$  = 16.78 min);  $^1H$ -NMR (600 MHz, DMSO- $d_6$ ):  $\delta$  10.70 (s, 1H, NH-1), 8.35 (s, 1H, C=SNH-1), 8.24 (s, 1H, C=SNH-3), 7.55 (d,  $J$  = 1.5 Hz, 1H, Ar-H), 7.24 (s, 1H, Ar-H), 7.19 (d,  $J$  = 8.6 Hz, 1H, Ar-H), 6.99 (dd,  $J$  = 1.9, 8.5 Hz, 1H, Ar-H), 6.86 (s, 2H, Ar-H), 6.02 (d,  $J$  = 1.6 Hz, 1H, H-3'), 3.75 (s, 3H,  $OCH_3$ ), 3.71 (s, 3H,  $OCH_3$ ), 2.03-2.08 (m, 3H, Ad-H), 1.92-1.98 (m, 6H, Ad-H), 1.72-1.80 (m, 6H, Ad-H);  $^{13}C$  NMR (150 MHz, DMSO- $d_6$ ):  $\delta$  180.9 (C=S), 150.6 (C-2'), 149.3 (Ar-C), 144.2 (Ar-C), 134.4 (Ar-C), 132.7 (Ar-C), 131.6 (Ar-C), 128.4 (Ar-C), 114.1 (Ar-CH), 113.1 (Ar-CH), 110.8 (Ar-CH), 110.3 (Ar-CH), 110.0 (Ar-CH), 104.2 (Ar-CH), 95.4 (C-3'), 56.4 ( $OCH_3$ ), 55.8 ( $OCH_3$ ), 42.3 (Ad-C), 36.8 (s, 3C, Ad-C), 33.9 (s, 3C, Ad-C), 28.4 (s, 3C, Ad-C); HRMS(+):  $m/z$   $[M+H]^+$  calculated for  $C_{27}H_{32}N_3O_2S^+$ , 462.2210, found 462.223;  $[M+Na]^+$  calculated for  $C_{27}H_{31}N_3O_2SNa^+$ , 484.2029, found 484.2027.

**1-(4-cyanophenyl)-3-(2-adamantane-1H-indol-5-yl)thiourea thiourea (9n):** White solid; yield: 84.2%; mp: 245-247 °C; HPLC purity: 95.6% ( $t_R = 17.90$  min);  $^1\text{H}$  NMR (600MHz, DMSO- $d_6$ ):  $\delta$  10.75 (s, 1H, NH-1), 9.07 (s, 1H, C=SNH-1), 8.54 (s, 1H, C=SNH-3), 7.68-7.73 (m, 2H, Ar-H), 7.64 (d,  $J = 8.8$  Hz, 2H, Ar-H), 7.56 (s, 1H, Ar-H), 7.22 (d,  $J = 8.6$  Hz, 1H, Ar-H), 7.02 (dd,  $J = 1.8, 8.6$  Hz, 1H, Ar-H), 6.03 (d,  $J = 1.5$  Hz, 1H, H-3'), 2.02-2.08 (m, 3H, Ad-H), 1.92-1.98 (m, 6H, Ad-H), 1.72-1.80 (m, 6H, Ad-H);  $^{13}\text{C}$  NMR (150 MHz, DMSO- $d_6$ ):  $\delta$  181.2 (C=S), 150.8 (C-2'), 145.2 (Ar-C), 133.7 (Ar-C), 133.1 (Ar-C), 130.8 (Ar-C), 128.3 (Ar-C), 119.9 (Ar-CH), 118.2 (Ar-CH), 114.3 (Ar-CH), 111.1 (Ar-CH), 110.6 (Ar-CH), 95.4 (C-3'), 42.3 (Ad-C), 36.8 (s, 3C, Ad-C), 33.9 (s, 3C, Ad-C), 28.4 (s, 3C, Ad-C); ESI-HRMS (+):  $m/z$  [M+H] $^+$  calculated for  $\text{C}_{26}\text{H}_{27}\text{N}_4\text{S}^+$ , 427.1951, found 427.1950; [M+Na] $^+$  calculated for  $\text{C}_{26}\text{H}_{26}\text{N}_4\text{SNa}^+$ , 449.1770, found 449.1771.

**1-(4-chloro-2-methylphenyl)-3-(1H-indol-2-adamantine-5-yl)thiourea (9o):** White solid; yield: 85.6%; mp: 280-282 °C; HPLC purity: 97.1% ( $t_R = 17.90$  min);  $^1\text{H}$ -NMR (600 MHz, DMSO- $d_6$ ):  $\delta$  10.82 (d,  $J = 1.3$  Hz, 1H, NH-1), 8.74 (s, 1H, C=SNH-1), 7.95 (d,  $J = 8.6$  Hz, 1H, Ar-H), 7.85 (s, 1H, C=SNH-3), 7.58 (d,  $J = 2.0$  Hz, 1H, Ar-H), 7.24 (d,  $J = 2.4$  Hz, 1H, Ar-H), 7.21 (d,  $J = 8.4$  Hz, 1H, Ar-H), 7.18 (dd,  $J = 2.4, 8.7$  Hz, 1H, Ar-H), 7.01 (dd,  $J = 2.0, 8.4$  Hz, 1H, Ar-H), 6.02 (d,  $J = 1.7$  Hz, 1H, H-3'), 2.25 (s, 3H, Ph- $\text{CH}_3$ ), 2.02-2.08 (m, 3H, Ad-H), 1.92-1.98 (m, 6H, Ad-H), 1.72-1.79 (m, 6H, Ad-H).  $^{13}\text{C}$ -NMR (150 MHz, DMSO- $d_6$ ):  $\delta$  181.1 (C=S), 150.7 (C-2'), 137.5 (Ar-C), 132.8 (Ar-C), 131.5 (Ar-C), 130.0 (Ar-C), 129.5 (Ar-CH), 128.4 (Ar-C), 126.3 (Ar-C), 125.9 (Ar-CH), 122.1 (Ar-CH), 114.0 (Ar-CH), 111.1 (Ar-CH), 110.0 (Ar-CH), 95.4 (C-3'), 42.3 (Ad-C), 36.8 (s, 3C, Ad-C), 33.9 (s, 3C, Ad-C), 28.4 (s, 3C, Ad-C), 18.1 (Ph- $\text{CH}_3$ ). ESI-HRMS (+):  $m/z$  [M+H] $^+$  calculated  $\text{C}_{26}\text{H}_{29}\text{ClN}_3\text{S}^+$ , 450.1765, found 450.1766; [M+Na] $^+$  calculated for  $\text{C}_{26}\text{H}_{28}\text{ClN}_3\text{SNa}^+$ , 472.1585, found 472.1587.
